# Supplementary material for: A highly sensitive wireless nitrogen dioxide gas sensor based on an organic conductive nanocomposite paste
Source: Royal Society of Chemistry journal article supplement (doi:10.1039/c9ta00198k), 2019-01-01
Supplement: c9ta00198k1.pdf [file c9ta00198k1.pdf]

Electronic Supplementary Information (ESI) for

## **Highly sensitive wireless nitrogen dioxide gas sensor based on organic conductive nanocomposite paste**

Sung Gun Kim<sup>a</sup>, Jaemoon Jun<sup>a, b</sup>, Jun Seop Lee<sup>c\*</sup>, and Jyongsik Jang<sup>a\*</sup>

<sup>a</sup> School of Chemical and Biological Engineering, College of Engineering, Seoul National University, 599 Gwanangno, Gwanakgu, Seoul, 151-742 (Korea),

<sup>b</sup> LG Chem R&D Campus Daejeon, 188, Munji-ro, Yuseong-gu, Daejeon, 34122, Republic of Korea

<sup>c</sup> Department of Materials Science and Engineering, Gachon University, 1342 Seongnamdaero, Sujeong-gu, Seongnam-Si, Gyeonggi-Do, 13120 (Korea)

Corresponding Author:

\*E-mail: (J. Jang) [jsjang@plaza.snu.ac.kr](mailto:jsjang@plaza.snu.ac.kr); Tel.: +82-2-880-7069; Fax: +82-2-880-1604

\*E-mail: (J.S. Lee) [junseop@gachon.ac.kr](mailto:junseop@gachon.ac.kr); Tel.: +82-31-750-5814; Fax: +82-31-750-5389

## 1. Schematic diagram of the M\_FeHNPs

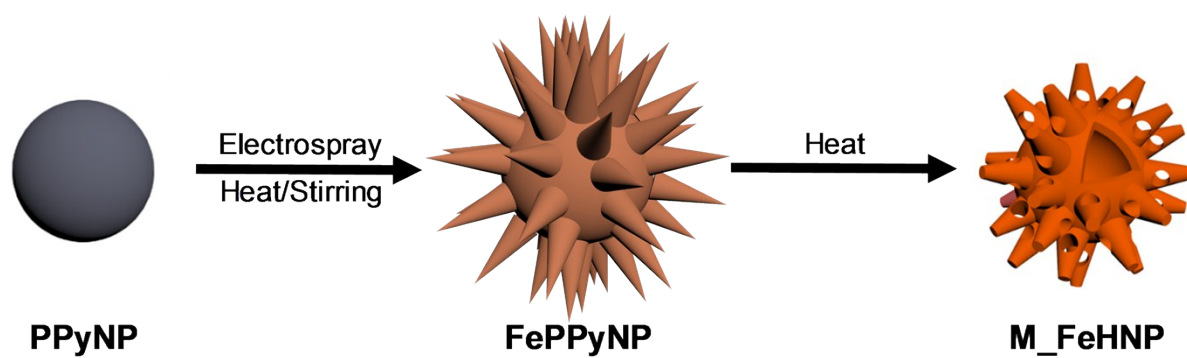

**Figure S1.** Schematic illustration diagram for a fabrication of the multidimensional Fe<sub>2</sub>O<sub>3</sub> hollow nanoparticles (M\_FeHNPs).

## 2. TEM images of each step nanoparticles

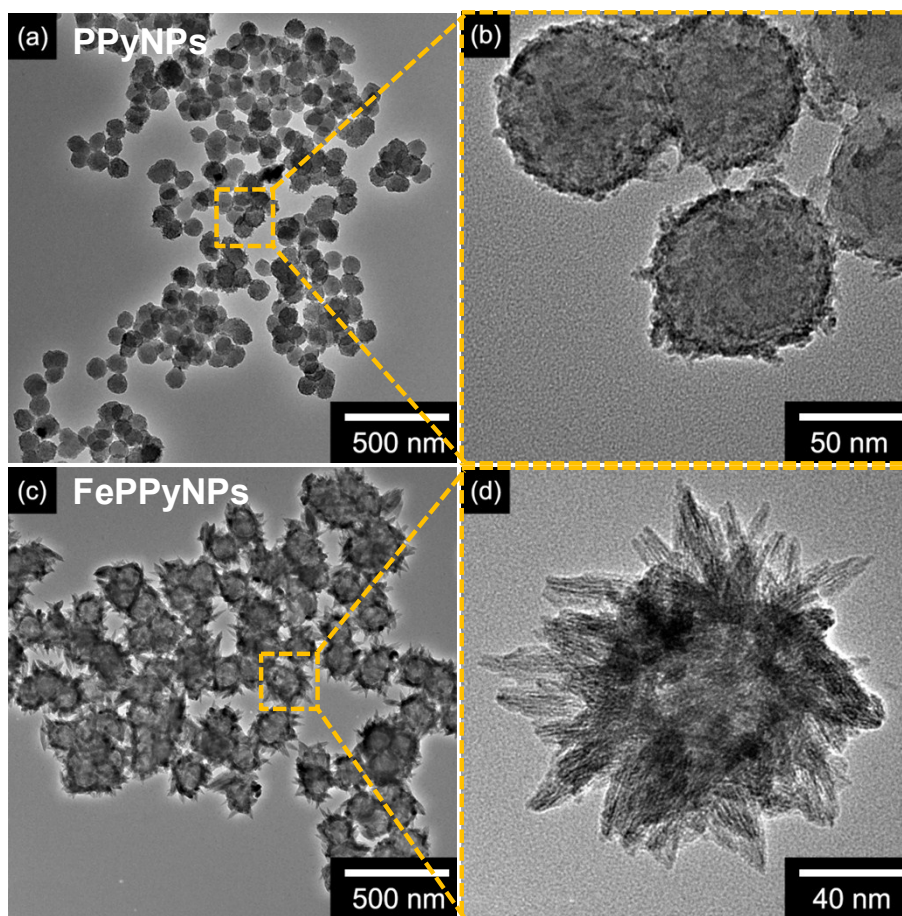

**Figure S2.** Low and high magnification of TEM images for each synthesis step particles ((a) and (b): polypyrrole nanoparticles (PPyNP); (c) and (d): FeOOH needle decorated polypyrrole nanoparticles (FePPyNP)).

### 3. XRD patterns of the nanoparticles

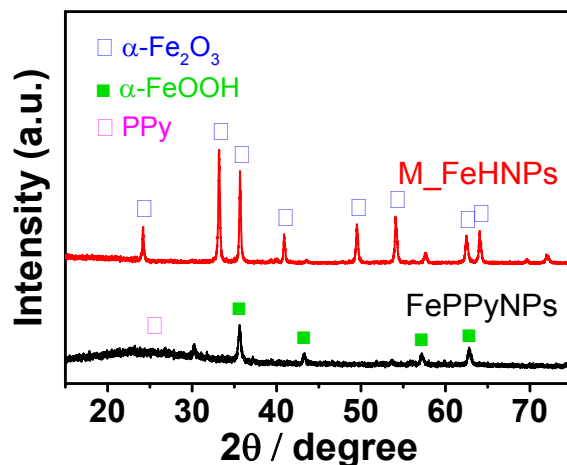

**Figure S3.** X-ray diffraction (XRD) of FePPyNPs (black) and M\_FeHNPs (red).

To characterize of the crystalline structure of each step nanoparticles, X-ray diffraction (XRD) analysis is conducted as shown in **Figure S3**. The narrow peaks of the FeOOH-decorated nanoparticles (FePPyNPs) indicate  $\alpha\text{-FeOOH}$  (JCPDS 29-713) and the broad peak around  $25.6^\circ$  of the particle suggests polypyrrole core in the structure. On the other hand, M\_FeHNPs present narrow peaks of  $\alpha\text{-Fe}_2\text{O}_3$  (JCPDS 84-0311) without broad peak because of phase transfer of FeOOH to  $\text{Fe}_2\text{O}_3$  with pyrolysis of polypyrrole core during calcination step.

#### 4. Schematic diagram of the organic conductive paste

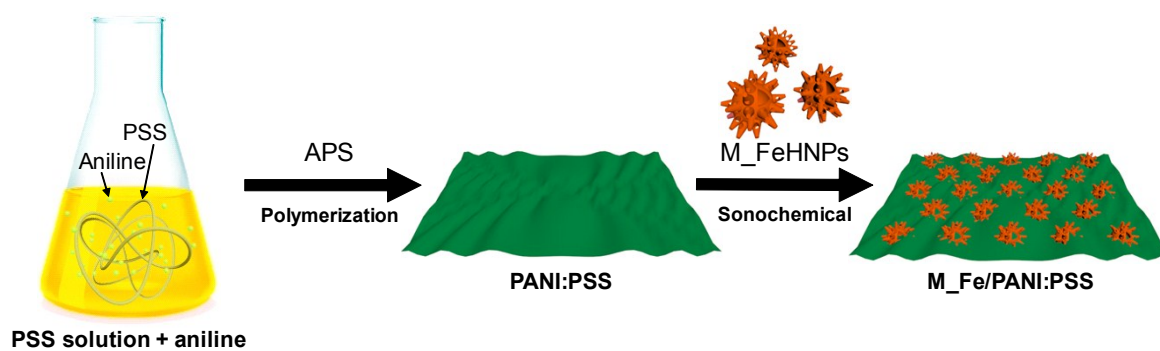

**Figure S4.** Illustrative diagram of the sequential fabrication for the organic conductive nanocomposite (M\_Fe/PANI:PSS) paste.

## 5. Organic conductive paste-deposited IDA electrode

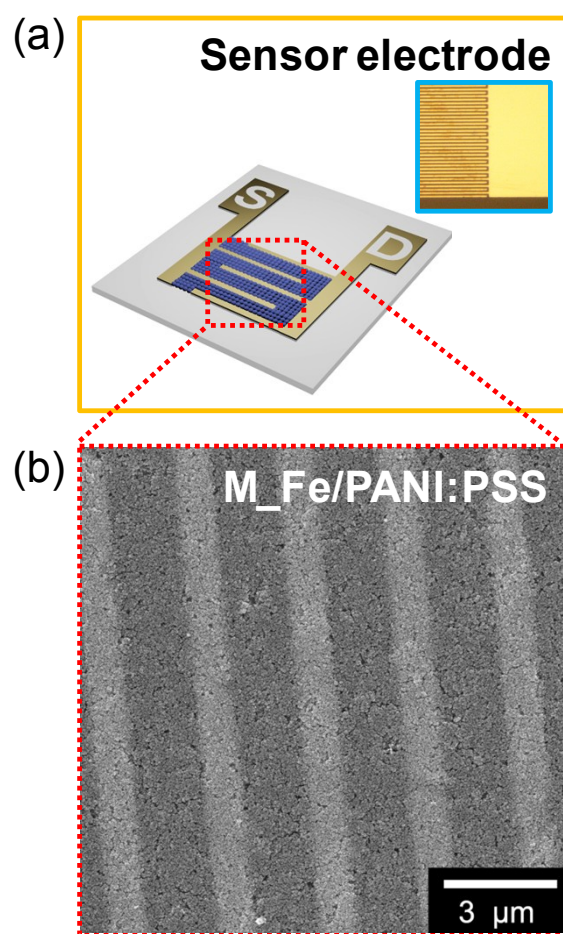

**Figure S5.** (a) Schematic illustration of the M\_Fe/PANI:PSS paste-deposited interdigitated array (IDA) electrode (inset : optical microscopy image of the IDA electrode). (b) FE-SEM image of the M\_Fe/PANI:PSS-deposited electrode.

## 6. Electrical properties of the conductive paste on the IDA electrode

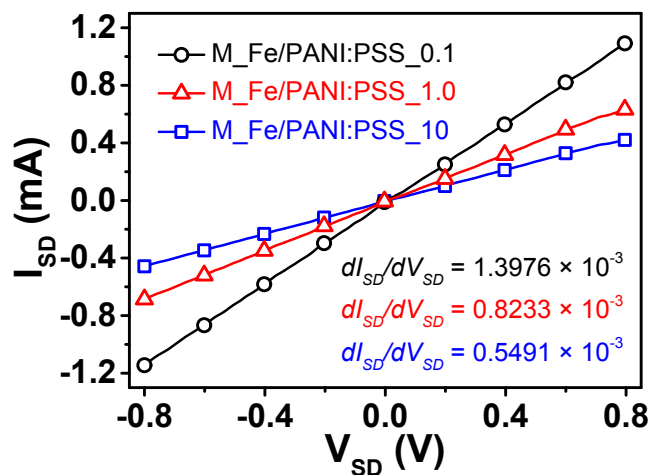

**Figure S6.** Current-voltage ( $I$ - $V$ ) curves for the different M\_Fe/PANI:PSS paste-deposited IDA electrodes (M\_Fe/PANI:PSS\_0.1: black; M\_Fe/PANI:PSS\_1: red; M\_Fe/PANI:PSS\_10: blue).

## 7. Energy band gap of the nanocomposite

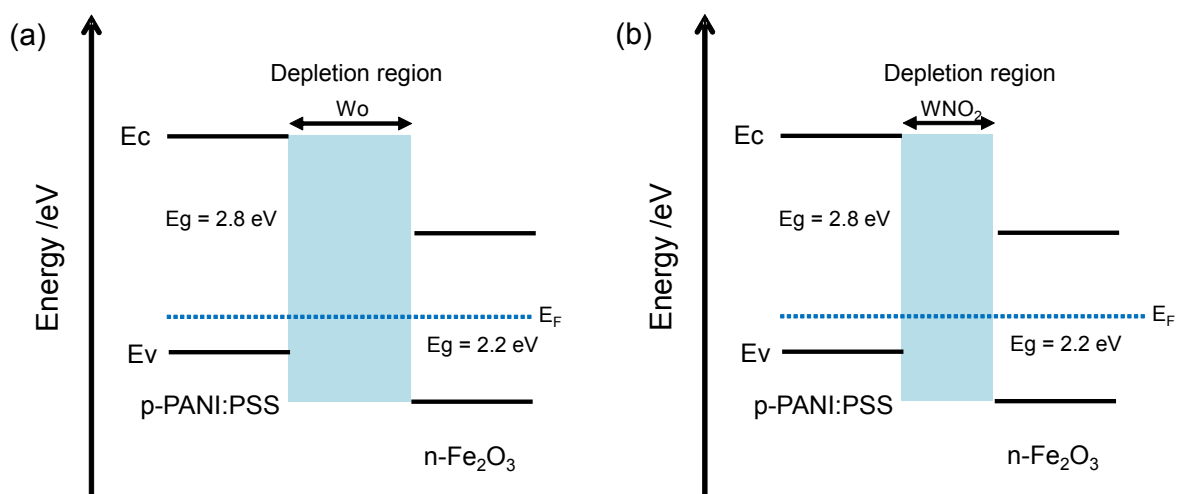

**Figure S7.** Energy band diagram for M\_Fe/PANI:PSS paste (a) before and (b) after exposure to NO<sub>2</sub> molecules.



## 8. Response change with different temperature of the sensor electrode

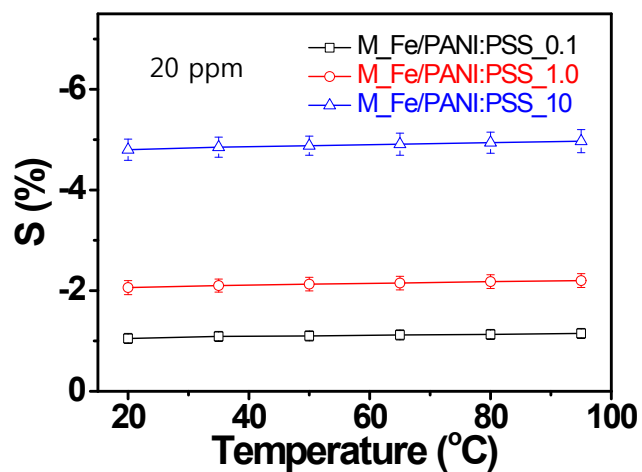

**Figure S8.** Calibration resistance curves of the different organic conductive nanocomposites as a function of different working temperature at 20 ppm of NO<sub>2</sub>. (black: M\_Fe/PANI:PSS\_0.1; red: M\_Fe/PANI:PSS\_1.0; blue: M\_Fe/PANI:PSS\_10)

## 9. Response and recovery time of the sensor electrode under various temperatures

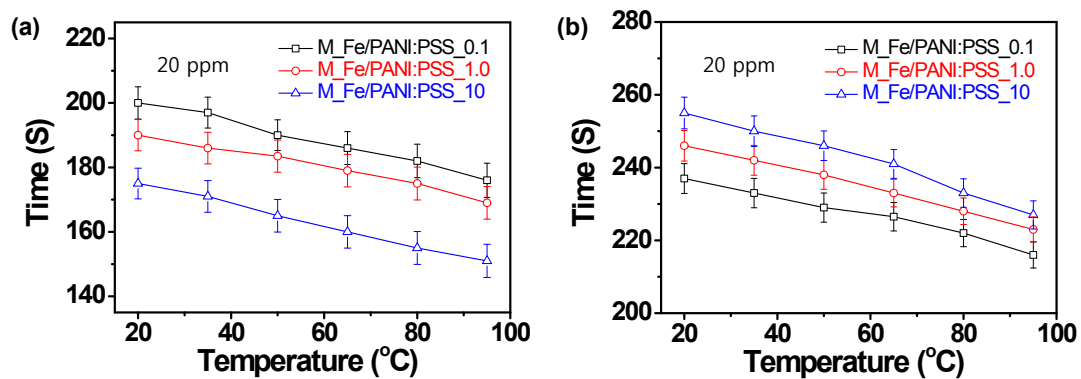

**Figure S9.** (a) Response and (b) recovery time of the different organic conductive nanocomposites as a function of different working temperature at 20 ppm of NO<sub>2</sub>. (black: M\_Fe/PANI:PSS\_0.1; red: M\_Fe/PANI:PSS\_1.0; blue: M\_Fe/PANI:PSS\_10)

## 10. Response changes of the sensor electrodes with changing relative humidity

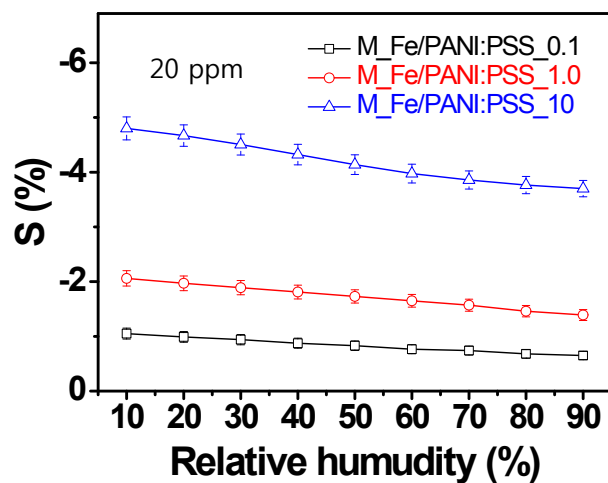

**Figure S10.** Calibration resistance curves of the different organic conductive nanocomposites as a function of different relative humidity at 20 ppm of NO<sub>2</sub>. (black: M\_Fe/PANI:PSS\_0.1; red: M\_Fe/PANI:PSS\_1.0; blue: M\_Fe/PANI:PSS\_10)

## 11. Selectivity of the sensor electrode

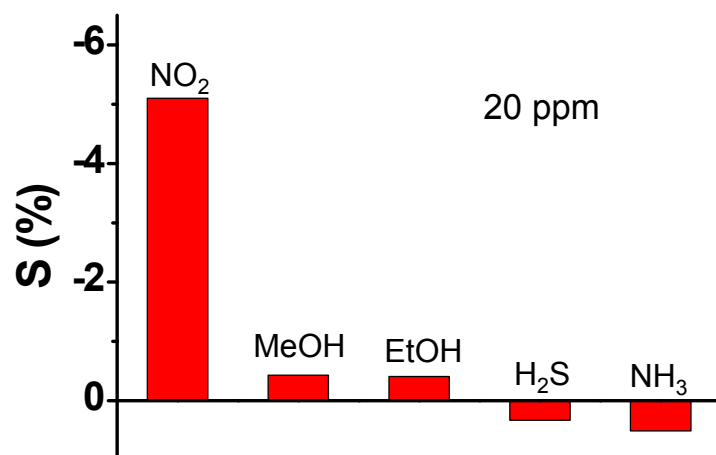

**Figure S11.** Response (S) changes of M<sub>Fe</sub>/PANI:PSS-based sensor electrode to different analytes at room temperature (concentration of the chemicals is maintained at 20 ppm).

## 12. Schematic diagram of the wireless sensing system

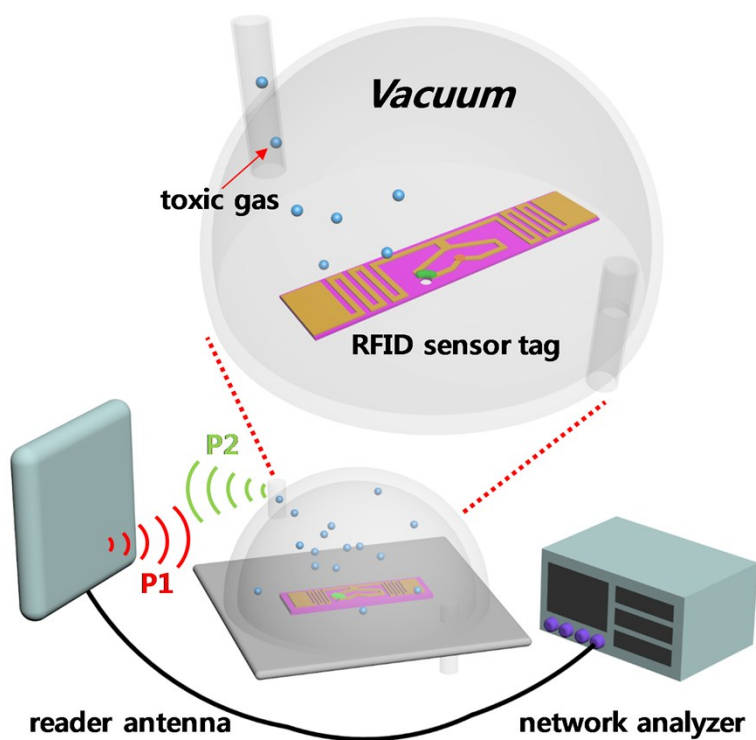

**Figure S12.** Schematic diagram of the RFID based-wireless sensor system consisting of reader antenna-connected network analyzer and a sensor tag.

### 13. Bending stability of the sensor tag

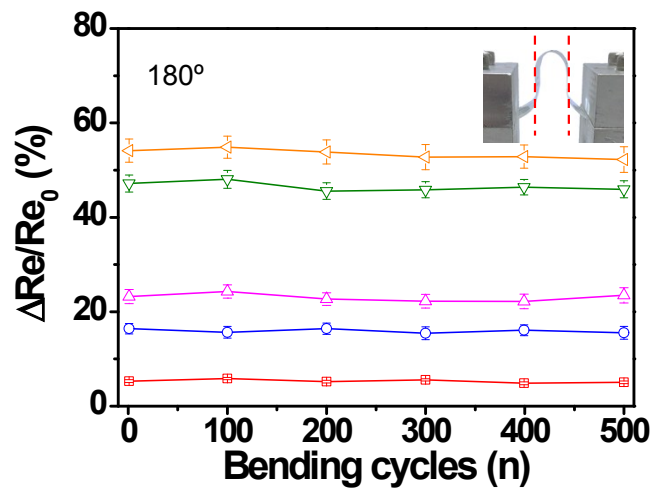

**Figure S13.** The normalized reflectance curves under repeated bending ( $180^\circ$ ) cycles at 10 cm distance apart with different  $\text{NO}_2$  gas concentrations (red: 0.5 ppm; blue: 1 ppm; pink: 5 ppm; green 25 ppm; yellow: 50 ppm).
